# Supplementary material for: HbA1c is associated with altered expression in blood of cell cycle- and immune response-related genes
Source: Springer Nature journal article supplement (doi:10.1007/s00125-017-4467-0), 2017-11-20
Supplement: MOESM1 [file 15239902]

## Electronic supplemental material

ESM Table 1, Characteristics of overall cohort, those within the biobank and the subsets for RNA and RNA-seq.

|                              | Entire population (2013) |             | Population in biobank (2013) |             | RNA population      |             | RNA-seq population  |             |
|------------------------------|--------------------------|-------------|------------------------------|-------------|---------------------|-------------|---------------------|-------------|
|                              | (n=8063)                 |             | (n=4921)                     |             | (n=1033)            |             | (n=391)             |             |
|                              | Median                   | IQR         | Median                       | IQR         | Median <sup>1</sup> | IQR         | Median <sup>1</sup> | IQR         |
| Age (years)                  | 67.5                     | [60.0-75.3] | 67.1                         | [59.9-74.2] | 65.0                | [57.7-72.4] | 64.0                | [57.3-70.0] |
| Sex (% female)               | 47.3                     |             | 44.5                         |             | 43.4                |             | 41.2                |             |
| Diabetes duration (years)    | 6.9                      | [3.2-12.0]  | 7.6                          | [4.1-12.5]  | 4.5                 | [2.5-8.7]   | 3.7                 | [2.1-5.5]   |
| Glucose (mmol/l)             | 7.8                      | [6.8-9.0]   | 7.8                          | [6.9-9.1]   | 7.8                 | [7.0-8.9]   | 7.9                 | [7.2-9.1]   |
| HbA <sub>1c</sub> (%)        | 6.5                      | [6.1-7.1]   | 6.5                          | [6.1-7.1]   | 6.4                 | [6.0-7.0]   | 6.4                 | [6.0-7.0]   |
| HbA <sub>1c</sub> (mmol/mol) | 47                       | [43-54]     | 47                           | [43-54]     | 47                  | 42-53]      | 47                  | [42-53]     |
| BMI (kg/m <sup>2</sup> )     | 29.2                     | [26.3-33.0] | 29.2                         | [26.5-32.9] | 29.5                | [26.5-33.0] | 29.5                | [26.4-33.0] |
| LDL (mmol/l)                 | 2.3                      | [1.8-3.0]   | 2.3                          | [1.8-2.9]   | 2.3                 | [1.8-3.0]   | 2.3                 | [1.8-2.9]   |
| HDL (mmol/l)                 | 1.2                      | [1.0-1.5]   | 1.2                          | [1.0-1.5]   | 1.2                 | [1.0-1.5]   | 1.2                 | [1.0-1.5]   |
| Triacylglycerol (mmol/l)     | 1.5                      | [1.1-2.1]   | 1.5                          | [1.1-2.1]   | 1.5                 | [1.1-2.1]   | 1.6                 | [1.1-2.2]   |
| Systolic BP (mmHg)           | 139                      | [126-155]   | 138                          | [126-154]   | 134                 | [124-152]   | 134                 | [124-152]   |
| Diastolic BP (mmHg)          | 78                       | [73-84]     | 78                           | [73-84]     | 78                  | [74-84]     | 80                  | [75-85]     |
| eGFR (ml/min)                | 81.0                     | [67.2-95.2] | 81.3                         | [67.8-95.2] | 83.0                | [70.5-96.4] | 85.8                | [73.4-98.5] |
| Metformin use (%)            | 68.5                     |             | 70.5                         |             | 71.2                |             | 89.5                |             |
| SU use (%)                   | 29.9                     |             | 31.9                         |             | 29.9                |             | 11.8                |             |
| Insulin use (%)              | 23.3                     |             | 24.5                         |             | 17.1                |             | 12.0                |             |

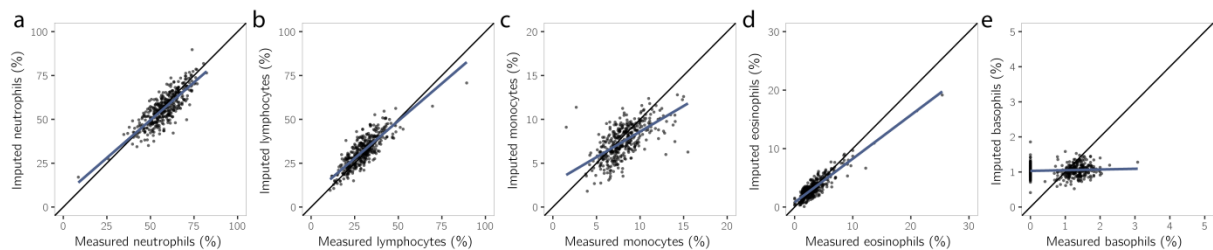

ESM Fig. 1. Measured blood cell percentages against imputed blood cell percentages. **a** Neutrophils,  $r = 0.81$ . **b** lymphocytes,  $r = 0.83$ . **c** monocytes,  $r = 0.64$ . **d** eosinophils,  $r = 0.91$ . **e** basophils,  $r = 0.08$ .

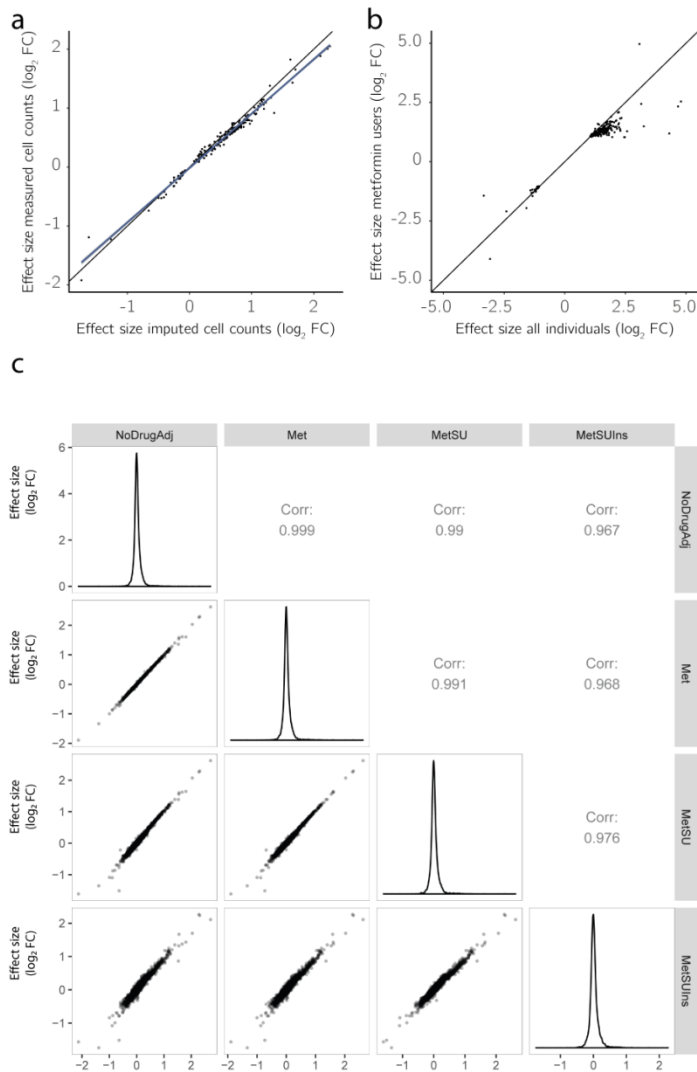

ESM Fig. 2. **a** Comparison of effect size (log<sub>2</sub> fold change) with imputed cell counts and measured cell counts. Pearson's correlation between two models:  $r = 0.99$ . **b** Comparison of effect size of the model on all individuals and a stratified analysis on metformin users only. Pearson's correlation between two models:  $r = 0.94$ . **c** Comparison of effect size of models 1) without adjustment for medication usage and with for 1) metformin, 2) metformin and SU and 3) metformin, SU and insulin. FC, fold change; Corr, correlation; NoDrugAdj, no adjustment for drug use; Met, adjustment for metformin only; MetSU, adjustment for metformin and sulfonylureas; MetSUIns, adjustment for metformin, sulfonylureas and insulin.

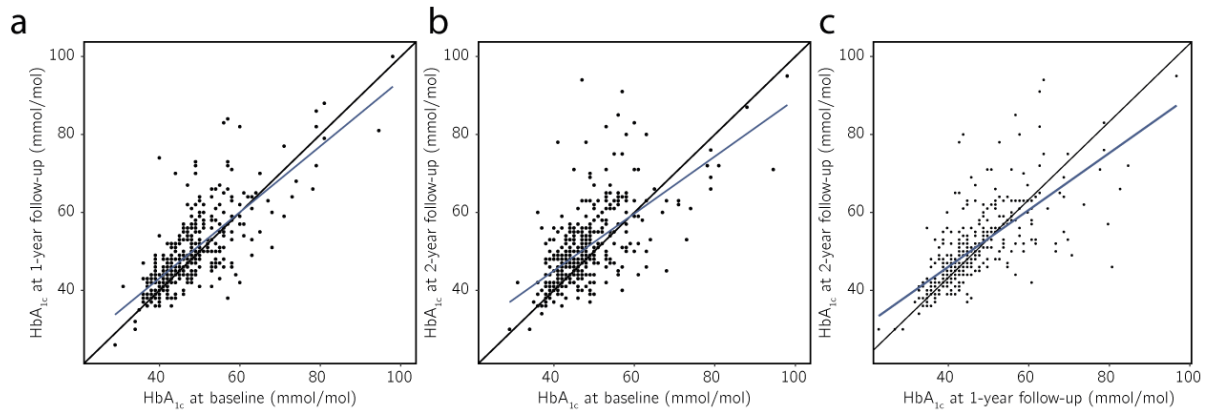

ESM Fig. 3. Correlation of HbA1c between successive years. **a** Baseline HbA<sub>1c</sub> vs. 1-year follow-up HbA<sub>1c</sub>,  $n = 370$ ,  $r = 0.76$ ,  $p < 0.0001$ . **b** Baseline HbA<sub>1c</sub> vs. 2-year follow-up HbA<sub>1c</sub>,  $n = 360$ ,  $r = 0.64$ ,  $p < 0.0001$ . **c** 1-year follow-up HbA<sub>1c</sub> vs. 2-year follow-up HbA<sub>1c</sub>,  $n = 354$ ,  $r = 0.74$ ,  $p < 0.0001$ .

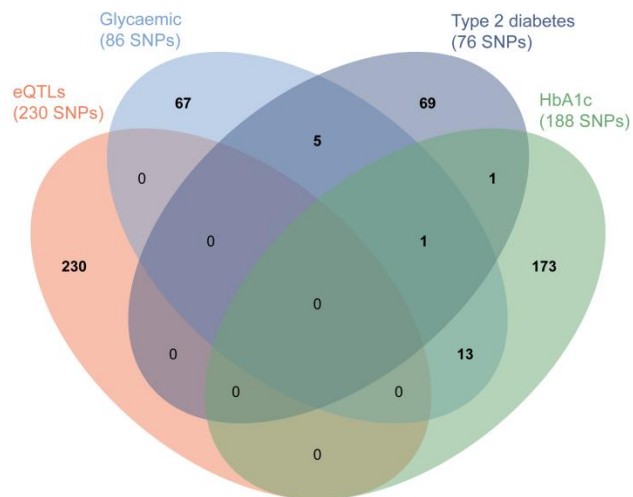

ESM Fig. 4. Overlap between 239 eQTL-SNPs and known diabetes-related traits.
